# Supplementary material
Source: PubMed Central journal article supplement (PMC8688866)
Supplement: mmc1.pdf [file mmc1.pdf]

**Table S2. N6 assay false-positive product sequencing**

| Primers to establish library                                                                                                                     | Forward                                                                                                                                           | Reverse                                                                                              | index in red | underscore incates the F2 of N6 |                                 |
|--------------------------------------------------------------------------------------------------------------------------------------------------|---------------------------------------------------------------------------------------------------------------------------------------------------|------------------------------------------------------------------------------------------------------|--------------|---------------------------------|---------------------------------|
| Sequencing results                                                                                                                               | AATGATACGGGGACCACGAGATCTACAC <u>TGCACGGTA</u> ACACTCTTCCCTACAGAGCTCTCCGATCT <u>GTCAAGGCTCTCTCGTTCCT</u>                                           | CAAGCAGAAAGCGCATACGAGATT <u>GCAACGTA</u> GTGACTGGAGTTCAGACGTGTGCTCTCCGAT <u>GCTCAAGCTGGTTC</u> AATCT |              |                                 | underscore incates the B2 of N6 |
|                                                                                                                                                  | <b>Top 10 reads</b>                                                                                                                               |                                                                                                      |              |                                 |                                 |
|                                                                                                                                                  | GTCAATCTCTCTCGTTCCTCTGCTAGATTGAACCAAGCTTGAGGCAAAAGCCATTCAAGCAGGGCTGCTGGAGTTGAATGTCAAGCCTCTCTCGTTCCTCTGCTAGATTAAACCACTTGAGCGCACCGCCAGTCAAGCAGGGATC |                                                                                                      |              | 2120402                         | 35.36%                          |
|                                                                                                                                                  | GTCAATCTCTCTCGTTCCTCTGCTAGATTGAACCAAGCTTGAGGCAAAAGCCATTCAAGCAGGGCTGCTGGAGTTGAATGTCAAGCCTCTCTCGTTCCTCTGCTAGATTAAACCACTTGAGCGCACCGCCAGTCAAGCAGGGAT  |                                                                                                      |              | 66114                           | 1.10%                           |
|                                                                                                                                                  | GTCAATCTCTCTCGTTCCTCTGCTAGATTGAACCAAGCTTGAGGCAAAAGCCATTCAAGCAGGGCTGCTGGAGTTGAATGTCAAGCCTCTCTCGTTCCTCTGCTAGATTAAACCACTTGAGCGCACCGCCAGTCAAGCAGGGAT  |                                                                                                      |              | 1432573                         | 23.89%                          |
|                                                                                                                                                  | GTCAATCTCTCTCGTTCCTCTGCTAGATTGAACCAAGCTTGAGGCAAAAGCCATTCAAGCAGGGCTGCTGGAGTTGAATGTCAAGCCTCTCTCGTTCCTCTGCTAGATTAAACCACTTGAGCGCACCGCCAGTCAAGCAGGGAT  |                                                                                                      |              | 917862                          | 15.31%                          |
|                                                                                                                                                  | GTCAATCTCTCTCGTTCCTCTGCTAGATTGAACCAAGCTTGAGGCAAAAGCCATTCAAGCAGGGCTGCTGGAGTTGAATGTCAAGCCTCTCTCGTTCCTCTGCTAGATTAAACCACTTGAGCGCACCGCCAGTCAAGCAGGGAT  |                                                                                                      |              | 217254                          | 3.62%                           |
|                                                                                                                                                  | GTCAATCTCTCTCGTTCCTCTGCTAGATTGAACCAAGCTTGAGGCAAAAGCCATTCAAGCAGGGCTGCTGGAGTTGAATGTCAAGCCTCTCTCGTTCCTCTGCTAGATTAAACCACTTGAGCGCACCGCCAGTCAAGCAGGGAT  |                                                                                                      |              | 70644                           | 1.18%                           |
|                                                                                                                                                  | GTCAATCTCTCTCGTTCCTCTGCTAGATTGAACCAAGCTTGAGGCAAAAGCCATTCAAGCAGGGCTGCTGGAGTTGAATGTCAAGCCTCTCTCGTTCCTCTGCTAGATTAAACCACTTGAGCGCACCGCCAGTCAAGCAGGGAT  |                                                                                                      |              | 55081                           | 0.92%                           |
|                                                                                                                                                  | GTCAATCTCTCTCGTTCCTCTGCTAGATTGAACCAAGCTTGAGGCAAAAGCCATTCAAGCAGGGCTGCTGGAGTTGAATGTCAAGCCTCTCTCGTTCCTCTGCTAGATTAAACCACTTGAGCGCACCGCCAGTCAAGCAGGGAT  |                                                                                                      |              | 31607                           | 0.53%                           |
| GTCAATCTCTCTCGTTCCTCTGCTAGATTGAACCAAGCTTGAGGCAAAAGCCATTCAAGCAGGGCTGCTGGAGTTGAATGTCAAGCCTCTCTCGTTCCTCTGCTAGATTAAACCACTTGAGCGCACCGCCAGTCAAGCAGGGAT |                                                                                                                                                   |                                                                                                      | 48189        | 0.80%                           |                                 |
| GTCAATCTCTCTCGTTCCTCTGCTAGATTGAACCAAGCTTGAGGCAAAAGCCATTCAAGCAGGGCTGCTGGAGTTGAATGTCAAGCCTCTCTCGTTCCTCTGCTAGATTAAACCACTTGAGCGCACCGCCAGTCAAGCAGGGAT |                                                                                                                                                   |                                                                                                      | 27643        | 0.46%                           |                                 |
|                                                                                                                                                  |                                                                                                                                                   |                                                                                                      | <b>Total</b> | <b>5996593</b>                  |                                 |
|                                                                                                                                                  |                                                                                                                                                   |                                                                                                      |              | <b>83.17%</b>                   |                                 |

**Table S3. The loop stem (F1c and B1c), LAMP amplification efficiency, and specificity**

| primer sets    | F1c               | Length | Tm (°C) | B1c               | Length | Tm(°C) | TT (min) | FP          |
|----------------|-------------------|--------|---------|-------------------|--------|--------|----------|-------------|
| <b>N gene</b>  |                   |        |         |                   |        |        |          | <b>LAMP</b> |
| N7             | tgccaatgtgatctt   | 15     | 47.9    | aatcgtgctacaac    | 14     | 45.2   | 19.7±0.8 | 1           |
| N8             | tccctctcgcta      | 13     | 46.7    | gtcgcaacagttc     | 13     | 45.9   | 43.9±5.3 | 3           |
| N9             | catcaccgccatt     | 13     | 47.2    | ttgctttgctgct     | 13     | 47.2   | 24.4±1.7 | 2           |
| N10            | gccttgctctoga     | 13     | 49      | caatagcagtcocaga  | 15     | 47.4   | 28.6±3.1 | 1           |
| N11            | ttgttagcaggattg   | 15     | 45.7    | caaggaacaacattg   | 15     | 45.2   | 28.4±6.6 | 1           |
| N12            | gcacgattgcag      | 12     | 45.1    | acaacattgccaaa    | 14     | 45.2   | 32.9±7.1 | 1           |
| N13            | cctttggcaatgtt    | 15     | 47.6    | agtcaagcctcttc    | 14     | 46.4   | 26.0±3.5 | 3           |
| N14            | cctctgcgtagaa     | 14     | 46.7    | tcatcagtagtcg     | 14     | 46.7   | 27.5±3.0 | 3           |
| N15            | cctctgcgtagaa     | 14     | 46.7    | acgtagtcgcaac     | 13     | 47.1   | 26.6±2.0 | 2           |
| N16            | cctctgcgtagaa     | 14     | 46.7    | agtcaagcctcttc    | 14     | 46.4   | 25.7±2.3 | 2           |
| N17            | aacgagaagaggc     | 13     | 45.4    | tcgcaacagttca     | 13     | 45.9   | 30.5±3.3 | 1           |
| N18            | gcctggagtgaat     | 14     | 47.3    | ctgctctgctttg     | 14     | 47     | 35.2±1.7 | 2           |
| N19            | gcctggagtgaat     | 14     | 47.3    | ctgctctgctttg     | 14     | 47     | 31.2±3.5 | 2           |
| N20            | caggagaagtctcc    | 14     | 47      | tgatgctgctctg     | 14     | 48     | 27.4±3.1 | 2           |
| N21            | ctagcaggagaagt    | 14     | 45.1    | ctgctctgctttg     | 14     | 47     | 42.6±4.9 | 2           |
| N22            | catcaccgccat      | 12     | 45.2    | ttgctttgctgct     | 13     | 47.2   | 41.7±4.4 | 2           |
| N23            | tcaccgccattg      | 12     | 45.7    | gcaaaaatgtctggt   | 14     | 45.6   | 22.6±2.4 | 2           |
| N24*           | catcaccgccatt     | 13     | 47.2    | gcaaaaatgtctggt   | 14     | 45.6   | 21.6±2.6 | 1           |
| N25*           | tcaatctgcaagca    | 15     | 47.5    | atgtctgtaagaggc   | 15     | 48.1   | 18.0±3.9 | 1           |
| N26            | attatgggtaaacctt  | 17     | 46      | ggcaaggaagacc     | 13     | 47.1   | 34.9±6.6 | 1           |
| N27*           | gagagcggtagac     | 13     | 47.6    | tcaggacaagggc     | 13     | 49     | 18.4±1.8 | 1           |
| N28            | gcaglattattgggta  | 16     | 45.4    | ttcaccgctctca     | 13     | 47.7   | 27.5±6.7 | 1           |
| <b>RT-LAMP</b> |                   |        |         |                   |        |        |          |             |
| N2(-5)         | aggctccctcagttgc  | 16     | 57.7    | attggcaccggcaatc  | 16     | 57.1   | 15.3±0.3 | 1           |
| N3(-4)         | attattgggtaaacctt | 17     | 46      | caaggaagacctt     | 12     | 38.8   | 23.1±3.2 | 1           |
| N4(-4)         | ccaatgtgatctt     | 13     | 38.8    | taacaatgctgct     | 12     | 38.7   | 21.4±4.9 | 1           |
| N6(-4)         | ctggagtgaat       | 12     | 35.9    | ctagaatggctg      | 12     | 35.9   | 21.9±3.4 | 1           |
| N7             | tgccaatgtgatctt   | 15     | 47.9    | aatcgtgctacaac    | 14     | 45.2   | 14.3±0.6 | 1           |
| N24*           |                   |        |         |                   |        |        | 20.4±1.8 | 3           |
| N25*           |                   |        |         |                   |        |        | 20.2±5.5 | 1           |
| N27*           |                   |        |         |                   |        |        | 11.7±0.1 | 1           |
| <b>M gene</b>  |                   |        |         |                   |        |        |          |             |
| M1             | tccttagcaggctc    | 14     | 45.9    | actgttgctacatca   | 15     | 47.1   | 22.6±2.9 | 1           |
| M2             | gtccttgatgtcac    | 14     | 45.1    | caaattgggagcttc   | 15     | 47.6   | 22.0±0.9 | 2           |
| M3             | cagaatagtgccatg   | 15     | 46.6    | agaagtgactgct     | 15     | 47.1   | 11.1±0.8 | 1           |
| M4             | gcaggctctgat      | 13     | 45.4    | ggagcttcgacg      | 14     | 46.8   | 31.1±2.3 | 1           |
| M5             | aaacagctgaaagaa   | 16     | 45.7    | ttctcaacgtgctc    | 13     | 47.2   | 16.5±0.4 | 1           |
| M6             | acatggaacgcg      | 12     | 46.6    | ttcttctcaacgtgctc | 15     | 49.6   | 15.2±0.4 | 1           |
| <b>S gene</b>  |                   |        |         |                   |        |        |          |             |
| S1             | gcaaagggtggca     | 12     | 46.4    | tgattgctcaatacac  | 16     | 47.1   | 24.8±2.1 | 1           |
| S2             | aggccgttaaaactt   | 14     | 46.6    | gttttgccacctt     | 14     | 46.3   | 15.5±1.4 | 3           |
| S3             | gaggctctagcag     | 14     | 46      | gtttaacggccttac   | 15     | 47.4   | 26.1±4.9 | 3           |
| S4             | gcaaagggtggcaaaa  | 14     | 49.9    | tgattgctcaatacac  | 16     | 47.1   | 23.1±2.9 | 1           |
| S5             | gtgtctgtggatca    | 14     | 46.5    | acaccaggaacaaa    | 14     | 46.2   | 21.5±1.8 | 4           |
| S6             | tcaagtgctgtgg     | 14     | 46.8    | caccaggaacaaata   | 15     | 45.1   | 17.5±0.8 | 4           |
| S7             | tgaggctctagca     | 14     | 46.5    | tttaacggccttact   | 15     | 47.1   | 19.2±2.9 | 1           |

TT represented 3-10 independent measures presented with mean± SD. \* same primer sets were used both for LAMP and RT-LAMP assays. FP was determined as described in "Method". From 3-4 replicates, the highest FP score was listed as the final FP for the primer.

**Table S4. The M Gene primer sets**

| Primer sets | Amplification Len | Sequence (5'-3')         | Sequence (5'-3') |    | Sequence (5'-3')        |     | Sequence (5'-3') |                           |     |    |
|-------------|-------------------|--------------------------|------------------|----|-------------------------|-----|------------------|---------------------------|-----|----|
| #           | B2-F2(Len)        | F3                       | Len              | Tm | F2                      | Len | Tm               | FL                        | Len | Tm |
| M1          | 123               | actattctgaccagaccgcttc   | 22               | 62 | tctcgtggacatcttcgtattgc | 22  | 60.7             | gatgtcacagcgtcctagatgg    | 22  | 62 |
| M2          | 157               | cattcttctcaacgtgccaactc  | 22               | 61 | cggagctgtgatcctctcgtg   | 20  | 62.6             | gtgtccagcaatcgaagatgt     | 22  | 60 |
| M3          | 129               | gctatcgcaatggcttgctctg   | 22               | 62 | ccatgtggctcattcaatccaga | 22  | 60               | ggcacgttgagaagaatgttagt   | 23  | 61 |
| M4          | 166               | cattcttctcaacgtgccaactc  | 22               | 61 | tgtgatccttcgtggacatcctt | 22  | 61.1             | tcctagatggtgtccagcaatc    | 23  | 61 |
| M5          | 160               | ggccagtaaccttagcttgTTTTg | 24               | 61 | cgcaatggcttgctctgttagg  | 21  | 61.6             | tgaagttagctgagccacatcaa   | 22  | 61 |
| M6          | 141               | gttttTgcttgctgctgttta    | 22               | 60 | aggcttgatgtggctcagcta   | 21  | 63.3             | gcaaacagctctgaaagaagcaatg | 24  | 61 |

  

| Primer sets | Sequence (5'-3')  | Sequence (5'-3') |    | Sequence (5'-3') |    |      |                          |
|-------------|-------------------|------------------|----|------------------|----|------|--------------------------|
| #           | F1c               | Len              | Tm | B1c              | BL | Len  | Tm                       |
| M1          | tctttaggcaggtc    | 14               | 46 | actgttgctacatca  | 15 | 47.1 | cttattacaaattgggagcttcgc |
| M2          | gtccttgatgtcac    | 14               | 45 | caaattgggagcttc  | 15 | 47.6 | gcgtgtagcagggtgactcag    |
| M3          | cagaatagtgccatg   | 15               | 47 | agaaagtgaactcgt  | 15 | 47.1 | gatccttcgtggacatcttcgt   |
| M4          | gcaggctcctgat     | 13               | 45 | ggagcttcgcag     | 12 | 46.8 | ggtgactcaggttttctgctgeat |
| M5          | aaacagctctgaaagaa | 16               | 46 | ttctcaacgtgcc    | 13 | 47.2 | tattctgaccagaccgcttcta   |
| M6          | acatggaacgcg      | 12               | 47 | ttcttctcaacgtgc  | 15 | 49.6 | tattctgaccagaccgcttcta   |

  

| Primer sets | Sequence (5'-3')        | Sequence (5'-3') |    | Sequence (5'-3')       |     |      |
|-------------|-------------------------|------------------|----|------------------------|-----|------|
| #           | B2                      | Len              | Tm | B3                     | Len | Tm   |
| M1          | aaacctgagtcacctgctacac  | 22               | 62 | attgtcactgctactggaatgg | 22  | 60   |
| M2          | tgtagcagctgtatgcagcaaa  | 22               | 62 | gctactggaatggtctgtgttt | 22  | 60.2 |
| M3          | cgtcctagatggtgtccagcaa  | 22               | 64 | gaaagcgttcgtgatgtagcaa | 22  | 61.4 |
| M4          | ttatagttgccaatcctgtagcg | 23               | 60 | gctactggaatggtctgtgttt | 22  | 60.2 |
| M5          | cagctccgattacagattcact  | 22               | 62 | gtccagcaatcgaagatgtcc  | 22  | 60.7 |
| M6          | agctccgattacagattcactt  | 22               | 61 | gtccagcaatcgaagatgtcc  | 22  | 60.7 |

  

| Primer sets | Sequence (5'-3')                       | Sequence (5'-3') |                                       | PubMed |           |
|-------------|----------------------------------------|------------------|---------------------------------------|--------|-----------|
| #           | FIP (F1c+F2)                           | Len              | BIP (B1c+B2)                          | Len    | Accession |
| M1          | tctttaggcaggctcttcgtggacatcttcgtattgc  | 36               | actgttgctacatcaaacctgagtcacctgctacac  | 37     | NC_045512 |
| M2          | gtccttgatgtcaccggagctgtgatccttcgtg     | 34               | caaattgggagctctcgtagcagctgtatgcagcaaa | 37     | NC_045512 |
| M3          | cagaatagtgccatgccaatggtcattcaatccaga   | 37               | agaaagtgaactcgtcgtcctagatggtgtccagcaa | 37     | NC_045512 |
| M4          | gcaggctcctgattgtgatccttcgtggacatctt    | 35               | ggagcttcgcagttatagttgccaatcctgtagcg   | 35     | NC_045512 |
| M5          | aaacagctctgaaagaacgcaatggcttgctctgtagg | 37               | ttctcaacgtgccagctccgattacagattcact    | 35     | NC_045512 |
| M6          | acatggaacgcgaggcttgatgtggctcagcta      | 33               | ttcttctcaacgtgcagctccgattacagattcactt | 37     | NC_045512 |

\* Note: Each primer set is composed of eight oligos, in which FIP is made by F1c+F2, and BIP is made by B1c+B2.

**Table S5. The S Gene primer sets**

| Primer sets |             |                        | Amplification Len |      | Sequence (5'-3')       |     | Sequence (5'-3') |                         | Sequence (5'-3') |      |
|-------------|-------------|------------------------|-------------------|------|------------------------|-----|------------------|-------------------------|------------------|------|
| #           | B2-F2 (Len) | F3                     | Len               | Tm   | F2                     | Len | Tm               | FL                      | Len              | Tm   |
| S1          | 124         | acacttgcatgctggctt     | 20                | 62.4 | tattgctgtagagacctcattt | 23  | 59               | agtaaggccgttaaaccttttgg | 23               | 59.4 |
| S2          | 122         | agtgacacttgcatgctg     | 20                | 60.3 | aatatggtagtgcttgggtga  | 22  | 59.7             | gcacaaatgaggtctctagcag  | 22               | 60.7 |
| S3          | 140         | attaccagatccatcaaaacca | 22                | 57.1 | agtgacacttgcatgctg     | 20  | 60.3             | accaaggcaatcaccatattgt  | 22               | 60   |
| S4          | 133         | agtgacacttgcatgctg     | 20                | 60.3 | cttggtagattgctgctagag  | 22  | 58.3             | gtaaggccgttaaaccttttgg  | 22               | 58.1 |
| S5          | 174         | tcaatggtttaacaggcacagg | 22                | 60.8 | aagttctgctttccaacaat   | 22  | 58.6             | cagtagtgcagcaatgtctct   | 22               | 59.4 |
| S6          | 169         | tcaatggtttaacaggcacagg | 22                | 60.8 | ctgctttccaacaatttggc   | 21  | 60.6             | tcagtagtgcagcaatgtctc   | 22               | 59.4 |
| S7          | 136         | attaccagatccatcaaaacca | 22                | 57.1 | cacttgcatgctggctt      | 19  | 60.7             | accaaggcaatcaccatattgt  | 22               | 60   |

  

| Primer sets |                 |     | Sequence (5'-3') |                  | Sequence (5'-3') |      | Sequence (5'-3')        |    |      |    |
|-------------|-----------------|-----|------------------|------------------|------------------|------|-------------------------|----|------|----|
| #           | F1c             | B1c | Len              | Tm               | B1c              | Len  | Tm                      | BL | Len  | Tm |
| S1          | gcaaaggtggca    | 12  | 46.4             | tgattgctcaatacac | 16               | 47.1 | ctgttagcgggtacaatcaactt | 22 | 60   |    |
| S2          | aggccgttaaacct  | 14  | 46.6             | gttttgccacctt    | 14               | 46.3 | cacagatgaaatgattgctcaa  | 22 | 57   |    |
| S3          | gaggtctctagcag  | 14  | 46               | gtttaacggccttac  | 15               | 47.4 | cccttgctcacagatgaaatga  | 22 | 58.6 |    |
| S4          | gcaaaggtggcaaa  | 14  | 49.9             | tgattgctcaatacac | 16               | 47.1 | gttagcgggtacaatcaacttct | 22 | 59.8 |    |
| S5          | gtgtctgtggatca  | 14  | 46.5             | acaccaggaacaaa   | 14               | 46.2 | taaccaggtgctgtcttcttat  | 22 | 57.3 |    |
| S6          | tcaagtgctctgtgg | 14  | 46.8             | caccaggaacaaaata | 15               | 45.1 | aaccaggtgctgtcttcttatc  | 22 | 58.5 |    |
| S7          | tgaggtctctagca  | 14  | 46.5             | tttaacggccttact  | 15               | 47.1 | cccttgctcacagatgaaatga  | 22 | 58.6 |    |

  

| Primer sets |                         |    | Sequence (5'-3') |                          | Sequence (5'-3') |      | Sequence (5'-3') |  |
|-------------|-------------------------|----|------------------|--------------------------|------------------|------|------------------|--|
| #           | B2                      | B3 | Len              | Tm                       | B3               | Len  | Tm               |  |
| S1          | ctgcaccaaaggtccaacc     | 19 | 60.9             | acattctgtgtaactccaatacca | 24               | 59.4 |                  |  |
| S2          | aagtgtatgtaccgctaacag   | 22 | 60               | ccattaaacctataagccatttgc | 24               | 58.1 |                  |  |
| S3          | gctaacaagtgcagaagtgtatt | 22 | 58.3             | ctgcaccaaaggtccaacc      | 19               | 60.9 |                  |  |
| S4          | ccctgcaccaaaggtccaacc   | 19 | 60.9             | ccattaaacctataagccatttgc | 24               | 58.1 |                  |  |
| S5          | acagggacttctgtgcagtt    | 20 | 61               | ggagtaagttgatctgcatgaa   | 22               | 57.8 |                  |  |
| S6          | aacagggacttctgtgcagtt   | 20 | 61               | ggagtaagttgatctgcatgaa   | 22               | 57.8 |                  |  |
| S7          | cgctaacaagtgcagaagtgtat | 22 | 60.4             | ctgcaccaaaggtccaacc      | 19               | 60.9 |                  |  |

  

| Primer sets |                                        |              | Sequence (5'-3') |                                        | Sequence (5'-3') |     | PubMed    |           |
|-------------|----------------------------------------|--------------|------------------|----------------------------------------|------------------|-----|-----------|-----------|
| #           | FIP (F1c+F2)                           | BIP (B1c+B2) | Len              | Tm                                     | BIP (B1c+B2)     | Len | Tm        | Accession |
| S1          | gcaaaggtggcatattgctgctagagacctcattt    | 35           |                  | tgattgctcaatacacactgcaccaaaggtccaacc   | 35               |     | NC_045512 |           |
| S2          | aggccgttaaaccttaatatggtgattgccttgggtga | 36           |                  | gttttgccaccttaagtattgaccgctaacag       | 36               |     | NC_045512 |           |
| S3          | gaggtctctagcagagtgcacttgcatgctg        | 34           |                  | gtttaacggccttacgtaacagtgacagaagtgtatt  | 37               |     | NC_045512 |           |
| S4          | gcaaaggtggcaaacctgggtgatattgctgctagag  | 36           |                  | tgattgctcaatacacactgcaccaaaggtccaacc   | 35               |     | NC_045512 |           |
| S5          | gtgtctgtggatcaaaagttctgcctttccaacaat   | 36           |                  | acaccaggaacaaaacagggacttctgtgcagtt     | 34               |     | NC_045512 |           |
| S6          | tcaagtgctctgtggctgcctttccaacaatttggc   | 35           |                  | caccaggaacaaaataaacagggacttctgtgcagtt  | 35               |     | NC_045512 |           |
| S7          | tgaggtctctagcaaaccttgcatgctggctt       | 33           |                  | tttaacggccttactgcctaacaagtgcagaagtgtat | 37               |     | NC_045512 |           |

\* Note: Every primer set is composed of eight oligos, in which FIP is made by F1c+F2, and BIP is made by B1c+B2.

**Table S6. Case #16 RT-LAMP product sequencing results**

| Primers to establish library | Forward                                                                                                                        | AATGATACGGCGACCCAGAGATCTACACCTAGACTGCACACTCTTCCCTACACGACGCTCTTCGGATCTGGGCGGATCAAAAAGAGC |                                                      |                              |                                                                      |
|------------------------------|--------------------------------------------------------------------------------------------------------------------------------|-----------------------------------------------------------------------------------------|------------------------------------------------------|------------------------------|----------------------------------------------------------------------|
| Sequencing results           | Reverse                                                                                                                        | CAAGCAGAGACCGCATACGAGATCTAGACTGGGTGACTGGAGTTCAGACGTGTGCTCTCCGATTCGGGTAGGCAATTGGTC       | SARS-CoV-2 genomic RNA<br>(MN908947.3), % identities | index in red<br>index in red | underscore incates the F2 of N27<br>underscore incates the B2 of N27 |
|                              | Top 10 reads                                                                                                                   |                                                                                         |                                                      | read count                   | % of total reads                                                     |
|                              | TGGGCCCCAAGGTTTACCCAAATAACTGGCTTGGTTCAACCGCTCTCACTCAACATGGCAAGGAAGACCTTAAATCCCTCGAGGACAAGGCGTTCCAAATTAACCAAAAACCCATACAAAATAACA |                                                                                         | 100%                                                 | 1497377                      | 38.33%                                                               |
|                              | TGGGCCCCAAGGTTTACCCAAATAACTGGCTTGGTTCAACCGCTCTCACTCAACATGGCAAGGAAGACCTTAAATCCCTCGAGGACAAGGCGTTCCAAATTAACCAAAAACCCATACAAAATAACA |                                                                                         | 100%                                                 | 1193621                      | 30.55%                                                               |
|                              | TGGGCCCCAAGGTTTACCCAAATAACTGGCTTGGTTCAACCGCTCTCACTCAACATGGCAAGGAAGACCTTAAATCCCTCGAGGACAAGGCGTTCCAAATTAACCAAAAACCCATACAAAATAACA |                                                                                         | 95%                                                  | 182513                       | 4.67%                                                                |
|                              | TGGCAACCCAGGTTTACCCAAATAACTGGCTTGGTTCAACCGCTCTCACTCAACATGGCAAGGAAGACCTTAAATCCCTCGAGGACAAGGCGTTCCAAATTAACCAAAAACCCATACAAAATAACA |                                                                                         | 94%                                                  | 106275                       | 2.72%                                                                |
|                              | ACCCAAATAACTGGCTTGGTTCAACCGCTCTCACTCAACATGGCAAGGAAGACCTTAAATCCCTCGAGGACAAGGCGTTCCAAATTAACCAAAAACCCATACAAAATAACA                |                                                                                         | 100%                                                 | 93284                        | 2.39%                                                                |
|                              | TGGGCCCCAAGGTTTACCCAAATAACTGGCTTGGTTCAACCGCTCTCACTCAACATGGCAAGGAAGACCTTAAATCCCTCGAGGACAAGGCGTTCCAAATTAACCAAAAACCCATACAAAATAACA |                                                                                         | 100%                                                 | 68159                        | 1.74%                                                                |
|                              | TGGGCCCCAAGGTTTACCCAAATAACTGGCTTGGTTCAACCGCTCTCACTCAACATGGCAAGGAAGACCTTAAATCCCTCGAGGACAAGGCGTTCCAAATTAACCAAAAACCCATACAAAATAACA |                                                                                         | 100%                                                 | 60954                        | 1.56%                                                                |
|                              | TGGGCCCCAAGGTTTACCCAAATAACTGGCTTGGTTCAACCGCTCTCACTCAACATGGCAAGGAAGACCTTAAATCCCTCGAGGACAAGGCGTTCCAAATTAACCAAAAACCCATACAAAATAACA |                                                                                         | 94%                                                  | 48579                        | 1.24%                                                                |
|                              | CGGCCCCAAGGTTTACCCAAATAACTGGCTTGGTTCAACCGCTCTCACTCAACATGGCAAGGAAGACCTTAAATCCCTCGAGGACAAGGCGTTCCAAATTAACCAAAAACCCATACAAAATAACA  |                                                                                         | 100%                                                 | 33875                        | 0.87%                                                                |
|                              | CGGCCCCAAGGTTTACCCAAATAACTGGCTTGGTTCAACCGCTCTCACTCAACATGGCAAGGAAGACCTTAAATCCCTCGAGGACAAGGCGTTCCAAATTAACCAAAAACCCATACAAAATAACA  |                                                                                         | 100%                                                 | 23569                        | 0.60%                                                                |
|                              | <b>Total</b>                                                                                                                   |                                                                                         |                                                      | <b>3906852</b>               | <b>84.68%</b>                                                        |

## Table S7. ACTB RT-LAMP primer set

### ACTB

|            |                                          |
|------------|------------------------------------------|
| <b>FIP</b> | GAGCCACACGCAGCTCATTGTATCACCAACTGGGACGACA |
| <b>BIP</b> | CTGAACCCCAAGGCCAACCGGCTGGGGTGTGAAGGTC    |
| <b>FL</b>  | TGTGGTGCCAGATTTTCTCCA                    |
| <b>BL</b>  | CGAGAAGATGACCCAGATCATGT                  |
| <b>F3</b>  | AGTACCCCATCGAGCACG                       |
| <b>B3</b>  | AGCCTGGATAGCAACGTACA                     |

### Reference

Zhang, Y., Ren, G., Buss, J., Barry, A. J., Patton, G. C., and Tanner, N. A. (2020)

Enhancing colorimetric loop-mediated isothermal amplification speed and sensitivity with guanidine chloride. *Biotechniques* 69, 178-185

**Table S8. Real-time PCR primers**

|                                          |          |                            |
|------------------------------------------|----------|----------------------------|
| <b>E-Sarbeco*</b>                        | <b>F</b> | ACAGGTACGTTAATAGTTAATAGCGT |
|                                          | <b>R</b> | ATATTGCAGCAGTACGCACACA     |
| <b>Beta-actin (ACTB)</b>                 | <b>F</b> | CTATCCCTGTACGCCTCTGG       |
|                                          | <b>R</b> | GTCACCGGAGTCCATCACC        |
| <b>Human coronavirus 229E</b>            | <b>F</b> | CGTGTTGGGACAGACATACTATC    |
|                                          | <b>R</b> | CTGAACACCTGAAGCCAATCTA     |
| <b>Human coronavirus OC43</b>            | <b>F</b> | TGGAGCGTATGGCTGATTTG       |
|                                          | <b>R</b> | GCATAGTTTGCAAGGCAGAAAC     |
| <b>Influenza A virus (H1N1)</b>          | <b>F</b> | GGGAACGGTGACCCAAATAA       |
|                                          | <b>R</b> | CAAGTGCACCAGCAGAATAAC      |
| <b>Human respiratory syncytial virus</b> | <b>F</b> | GGCAGTAGAGTTGAAGGGATTT     |
|                                          | <b>R</b> | TGCACACTAGCATGTCCTAAC      |
| <b>Human rhinovirus 16</b>               | <b>F</b> | GTCAAATGGATCCAGCCTCA       |
|                                          | <b>R</b> | GGGTCTTGAGAGAAGTCCAATC     |

\*Corman, V. M., Landt, O., Kaiser, M., Molenkamp, R., Meijer, A., Chu, D. K., Bleicker, T., Brunink, S., Schneider, J., Schmidt, M. L., Mulders, D. G., Haagmans, B. L., van der Veer, B., van den Brink, S., Wijsman, L., Goderski, G., Romette, J. L., Ellis, J., Zambon, M., Peiris, M., Goossens, H., Reusken, C., Koopmans, M. P., and Drosten, C.

(2020) Detection of 2019 novel coronavirus (2019-nCoV) by real-time RT-PCR. Euro Surveill 25
